# Supplementary material
Source: PubMed Central journal article supplement (PMC2602798)

Cell, *Volume 135*

**Supplemental Data**

**Noncoding Transcription by RNA Polymerase  
Pol IVb/Pol V Mediates Transcriptional Silencing  
of Overlapping and Adjacent Genes**

**Andrzej T. Wierzbicki, Jeremy R. Haag, and Craig S. Pikaard**

## Supplemental Material

### Chromatin Immunoprecipitation Details

Three grams of above-ground tissue of 2-week old plants was crosslinked with 0.5% formaldehyde for 10 min by vacuum infiltration, followed by addition of glycine to 80 mM. Plants were rinsed with water, frozen in liquid nitrogen, ground into powder using a mortar and pestle, suspended in 25 ml of Honda Buffer (20 mM HEPES-KOH pH 7.4, 0.44 M sucrose, 1.25% ficoll, 2.5% Dextran T40, 10 mM MgCl<sub>2</sub>, 0.5% Triton X-100, 5 mM DTT, 1 mM PMSF, 1% plant protease inhibitors (Sigma)), filtered through two layers of Miracloth and centrifuged at 2000 x g for 15 min. Nuclear pellets were washed three times with 1ml of Honda buffer, resuspended in Nuclei Lysis Buffer (50 mM Tris-HCl pH 8.0, 10 mM EDTA, 1% SDS, 1 mM PMSF, 1% Plant Protease Inhibitors) and sonicated as described (Lawrence et al. 2004). After centrifugation at 16,000 x g for 10 min., the supernatant was diluted 10-fold with 1.1% Triton X-100, 1.2 mM EDTA, 16.7 mM Tris-HCl pH 8.0, 167 mM NaCl. 25 µl of protein A agarose/salmon sperm DNA (Upstate Biologicals) and the appropriate antibody was added. Samples were then incubated overnight at 4°C on a rotating mixer. Agarose-antibody complexes were washed five times, 5 min each, with binding/washing buffer (150 mM NaCl, 20 mM Tris-HCl pH 8.0, 2 mM EDTA, 1% Triton X-100, 0.1% SDS, 1 mM PMSF) and washed twice for 5 min each with 10 mM Tris-HCl pH 8.0, 1 mM EDTA. 100µl of 10% (w/v) Chelex (Bio Rad) resin, in water, was then added to the beads and crosslinking was reversed at 99 °C for 10 min. Samples were digested with 20 µg of proteinase K (Invitrogen) for 1h at 43 °C followed by heat-inactivation at 95 °C for 10 min.

### RNA Immunoprecipitation Details

RNA IP was based on ChIP with the following modifications. RNase OUT RNase inhibitor (Invitrogen) was included in all buffers. IP was performed for 3h followed by four washes with Binding/Washing buffer. Immune complexes were eluted with 100 mM Tris-HCl pH 8.0, 10 mM EDTA, 1% SDS for 10 min at room temperature followed by a second elution at 65 °C. Crosslinking was reversed at 65 °C for 1h in the presence of 20 µg Proteinase K (Invitrogen). RNA was purified by extraction with acidic phenol:chloroform and ethanol precipitation.

## Supplemental Table and Figures

Table S1. Oligonucleotides Used in This Study

| Target               | Name     | Sequence (5' – 3')                                             | Application        |
|----------------------|----------|----------------------------------------------------------------|--------------------|
| Actin 2<br>At3g18780 | ACTmaiFW | TCATACTAGTCTCGAGAGATGACTCAGATCATGTTTGAG                        | RT-PCR             |
|                      | ACTmaiRV | TCATTCTAGAGGCGCGCCACAATTTCCCGTTCTGCGGTAG<br>(Herr et al, 2005) |                    |
|                      | A118     | GAGAGATTCAGATGCCCAGAAGTC                                       | real time PCR      |
|                      | A119     | TGGATTCCAGCAGCTTCCA                                            |                    |
|                      | A65      | CGAGCAGGAGATGGAAACCTCAA                                        |                    |
| AtSN1                | A66      | AAGAATGGAACCCGATCCAGACA                                        | Chop-PCR           |
|                      | A122     | CCAGAAATTCATCTTCTTTGGAAAAG                                     | real time PCR      |
|                      | A123     | GCCCAGTGGTAAATCTCTCAGATAGA                                     |                    |
| AtSN1 (A)            | ATS15    | ACCAACGTGCTGTTGGCCCAGTGGTAAATC                                 | RT-PCR<br>Chop-PCR |
|                      | AtSN1-F4 | AAAATAAGTGGTGGTTGTACAAGC<br>(Herr et al, 2005)                 |                    |
| AtSN1 (B)            | A205     | TGAGAGATTTACCACTGGGCCAACA                                      | RT-PCR             |
|                      | A206     | TGAGGAGCTCAACACATAAATGGCAATA                                   |                    |
| AtSN1 (C)            | A207     | CCTTTCCAAGACACCATCTCAACAAC                                     | RT-PCR             |
|                      | A208     | TCCTCAACAAAATAATTCCGAACGAC                                     |                    |
| IGN5 (A)             | A28      | TCCCGAGAAGAGTAGAACAAATGCTAAAA                                  | RT-PCR<br>Chop-PCR |
|                      | A29      | CTGAGGTATTCCATAGCCCCTGATCC                                     |                    |
| IGN5 (B)             | A293     | CGCAGCGGAATTGACATCCTATC                                        | RT-PCR             |
|                      | A294     | TCGGAAAGAGACTCTCCGCTAGAAA                                      |                    |
| IGN5                 | A193     | AAGCCCAAACCATACTAATAATCTAAT                                    | real time PCR      |
|                      | A194     | CCGAATAACAGCAAGTCCTTTTAATA                                     |                    |
| IGN5 bottom strand   | A69      | TCATGCGGCCCAATAACCAACAAAAC                                     | 5' RACE            |
|                      | A70      | TGAAGAAAGCCCAAACCATACTACT                                      |                    |
| IGN5 top strand      | A60      | TGTTGGTTATTGGGCCGCATGATACA                                     | 5' RACE            |
|                      | A67      | AGCATTGTGTTCTACTCTTCTCGGGAAC                                   |                    |
| IGN6                 | A30      | GGGACATCTATTGGGTTTAGGCTGGATG                                   | RT-PCR<br>Chop-PCR |
|                      | A31      | TTTGTAATTCTCAGTTCGGGTATCTGCTTG                                 |                    |
|                      | A162     | TTTCGCCGTCCTAACATGTAATG                                        | real time PCR      |
|                      | A163     | GAAGTAGCTTTTTCGGTCCAGTTC                                       |                    |
| IGN6 top strand      | A62      | TCGGTTGCTATGTTTGGCGATCATGC                                     | 5' RACE            |
|                      | A71      | CCAGCCTAAACCAATAGATGTCC                                        |                    |
| IGN7                 | A44      | CATCCACAACCTTCTATTGCTTTGTTTACC                                 | RT-PCR             |
|                      | A45      | TTTTCTTTGAGTTGGTCATTGTTGTTT                                    |                    |
| IGN10                | A50      | TCTAACGCTTTGGTTGTGTATAGTGTGC                                   | RT-PCR             |
|                      | A51      | ACCGGTATCTTAGTTCCTCCACGTGTC                                    |                    |
| IGN15                | A110     | CCATAGCATAGAACTTGCGGATATATGAA                                  | RT-PCR             |
|                      | A111     | CGGAAAAGGTAAGGTGGTTGGAAA                                       |                    |
| IGN17                | A114     | AACCCTAGCCTTTCATTAACCCCTCTC                                    | RT-PCR             |
|                      | A115     | CATAGATAGGAACTCAATCTCTTCGCATT                                  |                    |
| solo LTR A           | A221     | ATCAATTATTATGTCATGTTAAAACCGATTG                                | RT-PCR             |
|                      | A222     | TGTTTCGAGTTTTATTCTCTCTAGTCTTCATT                               |                    |
| solo LTR B           | A217     | CATATAACCGAAGCCGAAGGATGTGAAA                                   | RT-PCR             |
|                      | A218     | CAGAAACCTAAGGAACCATTACACGCTAAACC                               |                    |
| solo LTR C           | A211     | ATAAACTCGAAACAAGAGTTTTCTTATTGCTTTC                             | Chop-PCR           |
|                      | A212     | TAATGGTATTATTTTGATCAGTGTATAAACCGGA                             |                    |
| solo LTR             | A142     | GGATAGAGATGAATGATGGATAATGACA                                   | real time PCR      |
|                      | A143     | TTATTTTGATCAGTGTATAAACCGGATA                                   |                    |

Figure S1. The chromosomal contexts of *IGN7* and *IGN15* loci at which Pol V-dependent transcripts have been identified (Fig 1F). Shown are open reading frames (ORF), repetitive elements (TE repeats) and small RNAs from the MPSS database (sRNA). Single copy genes are marked in white, retrotransposons in grey and transposons in black. Data were obtained from <http://chromatin.cshl.edu/cgi-bin/gbrowse/arabidopsis5/>.

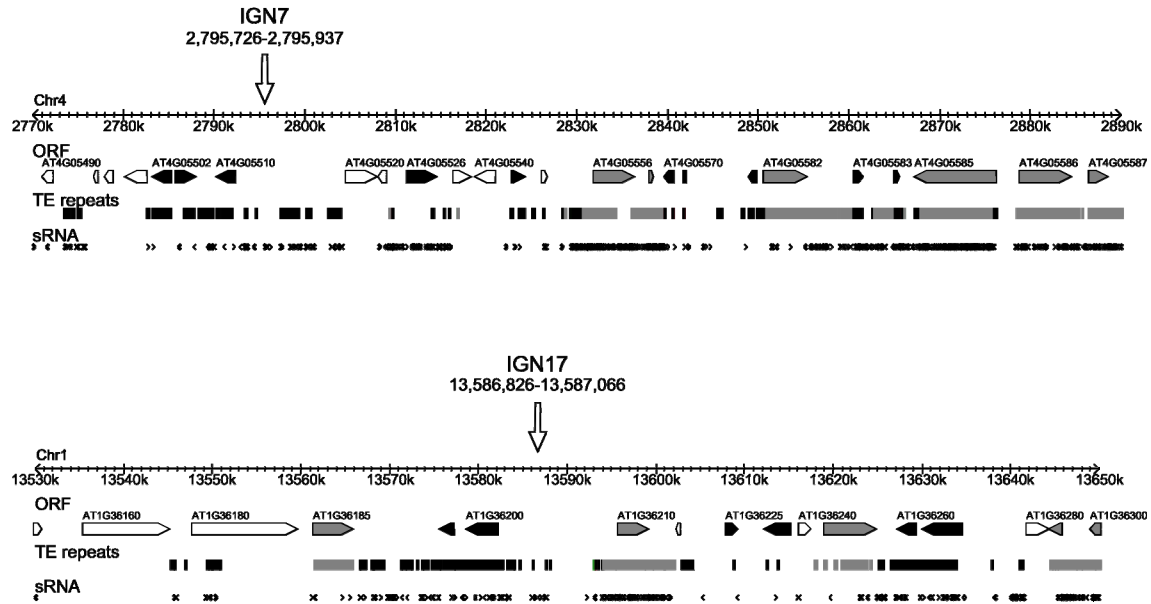

Figure S2. 5' ends of Pol V-dependent transcripts identified by 5' RACE. The terminal nucleotides of cloned 5' RACE products are marked with short arrows and n indicates the number of independent clones obtained for each 5' end. 5' RACE primers as well as nested primers used for amplification are marked with long arrows. Annotations above the DNA sequence refer to top strand-specific RACE clones and those below the DNA sequence refer to bottom strand clones.

### IGN5

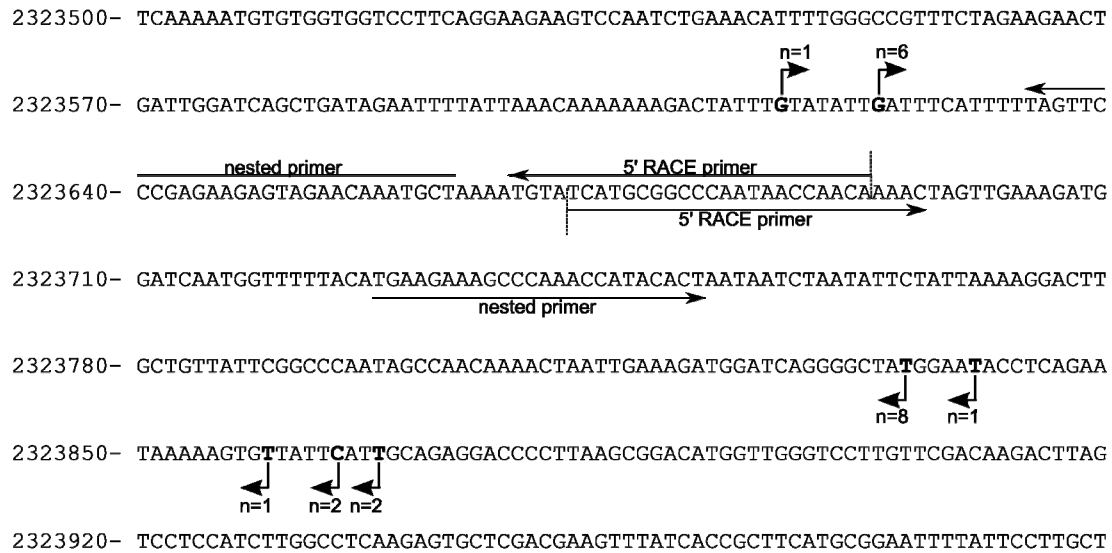

### IGN6

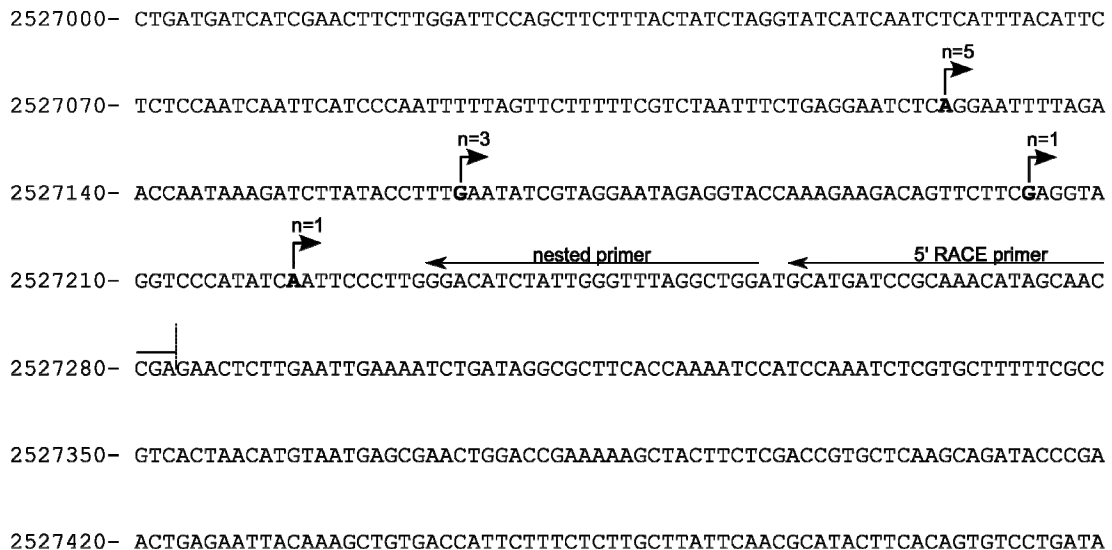

Figure S3. The chromosomal contexts of the *AtSN1* and *solo LTR* loci tested in our study. Shown are open reading frames (ORF), repetitive elements (TE repeats) and small RNAs in the MPSS database (sRNA). Single copy genes are marked in white, retrotransposons in grey and transposons in black. Data were obtained from <http://chromatin.cshl.edu/cgi-bin/gbrowse/arabidopsis5/>.

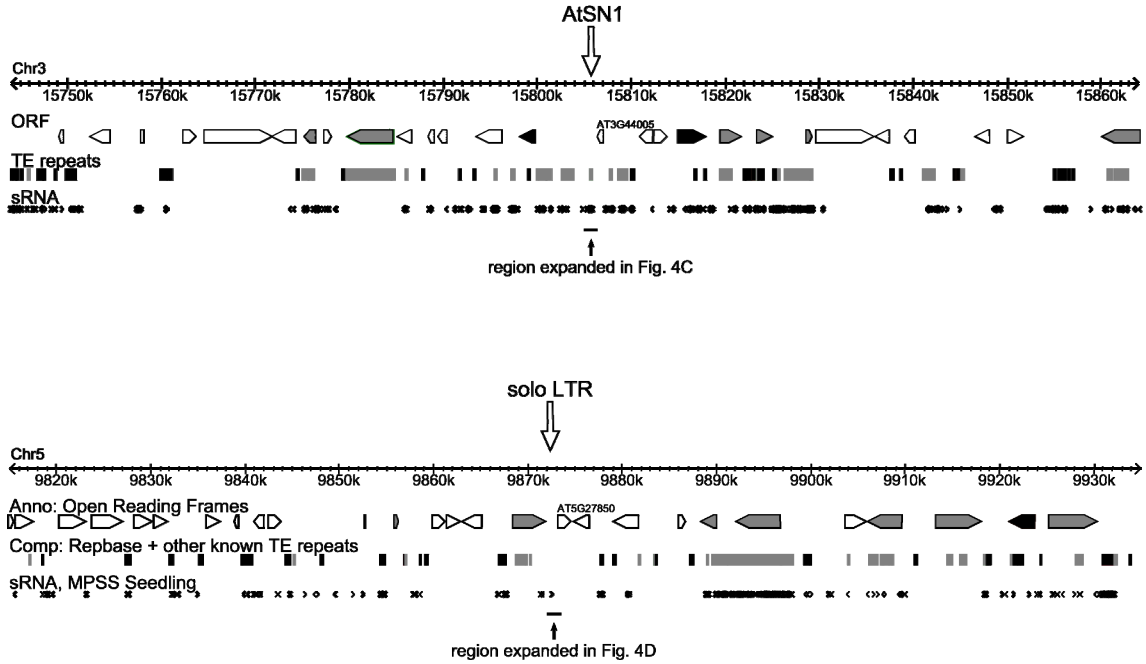

Figure S4. Quantitative PCR of control reactions in which no antibody was included in the chromatin immunoprecipitation (ChIP) experiments shown in Fig. 4F and Figs. 5A-C. Mean values for reactions performed in triplicate are essentially baseline in all cases.

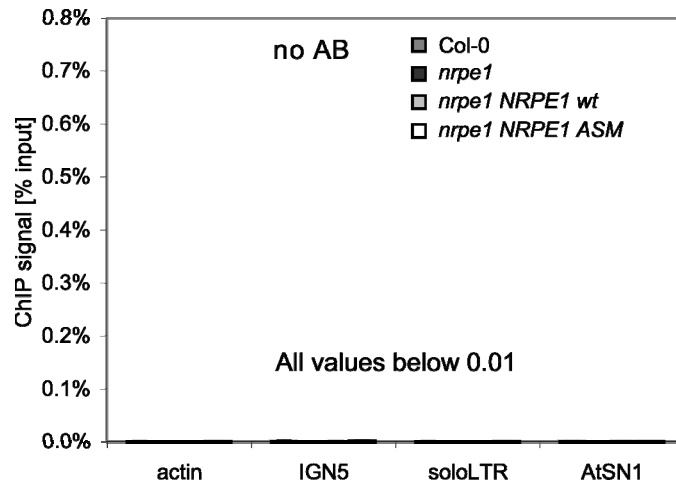

Supplement: NIHMS80148-supplement-01.pdf [file NIHMS80148-supplement-01.pdf]
